# Supplementary material for: Facile fabrication of Ag@C@C8 nanoparticles as a SERS substrate and their environmental applications
Source: Royal Society of Chemistry journal article supplement (doi:10.1039/d2an01073a), 2022-01-01
Supplement: d2an01073a1.pdf [file d2an01073a1.pdf]

## Electronic Supplementary Information

### Facile fabrication of Ag@C@C8 nanoparticles as a SERS substrate and its environmental applications

Tingting Zhang, ‡<sup>a</sup> Xiaoli Xin, ‡<sup>a</sup> Anqi Li,<sup>a</sup> Tao Xu,<sup>a</sup> Luo Li,<sup>a</sup> Chang Liu,<sup>b</sup> Weihua Li,<sup>c</sup>  
Jiansheng Li,<sup>a</sup> Yi Li<sup>\*a, d</sup> and Rui Lu<sup>\*a</sup>

- <sup>a</sup>. Jiangsu Key Laboratory of Chemical Pollution Control and Resources Reuse, School of Environmental and Biological Engineering, Nanjing University of Science and Technology, Nanjing 210094, People's Republic of China
- <sup>b</sup>. Information Materials and Intelligent Sensing Laboratory of Anhui Province, Anhui University, Hefei 230601, People's Republic of China
- <sup>c</sup>. School of Environment and Energy Engineering, Anhui Provincial Key Laboratory of Environmental Pollution Control and Resource Reuse, Anhui Jianzhu University, Hefei 230601, People's Republic of China
- <sup>d</sup>. State Key Laboratory of Marine Resource Utilization in South China Sea, College of Materials Science and Engineering, Hainan University, Haikou 570228, People's Republic of China

‡These authors contributed equally to this work.

\*Corresponding author, E-mail: a. [rlu@njust.edu.cn](mailto:rlu@njust.edu.cn); b. [liyi@hainanu.edu.cn](mailto:liyi@hainanu.edu.cn)

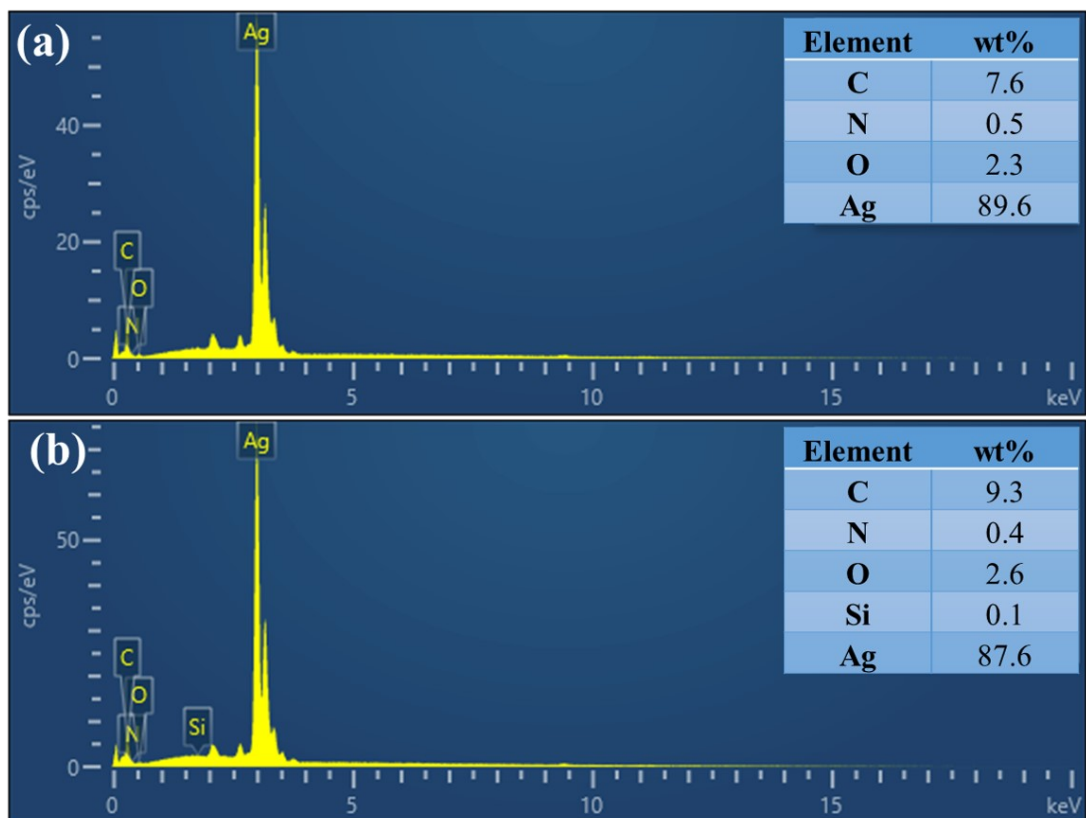

**Fig. S1** EDS spectrum of (a) Ag@C nanoparticles and (b) Ag@C@C8 nanoparticles.

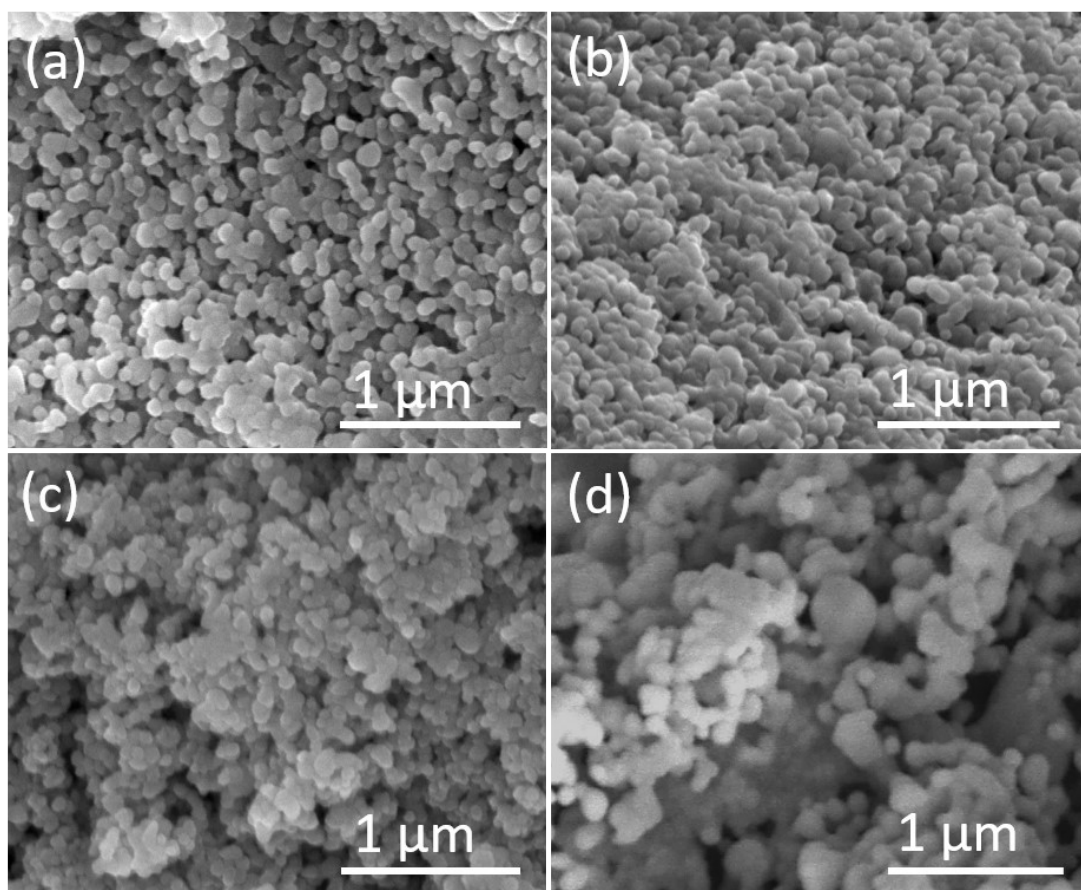

**Fig. S2** SEM images of SERS substrates prepared with varying amounts of C8 concentrations (a) 0.25%; (b) 0.5%; (c) 1.5%; and (d) 2.0%.

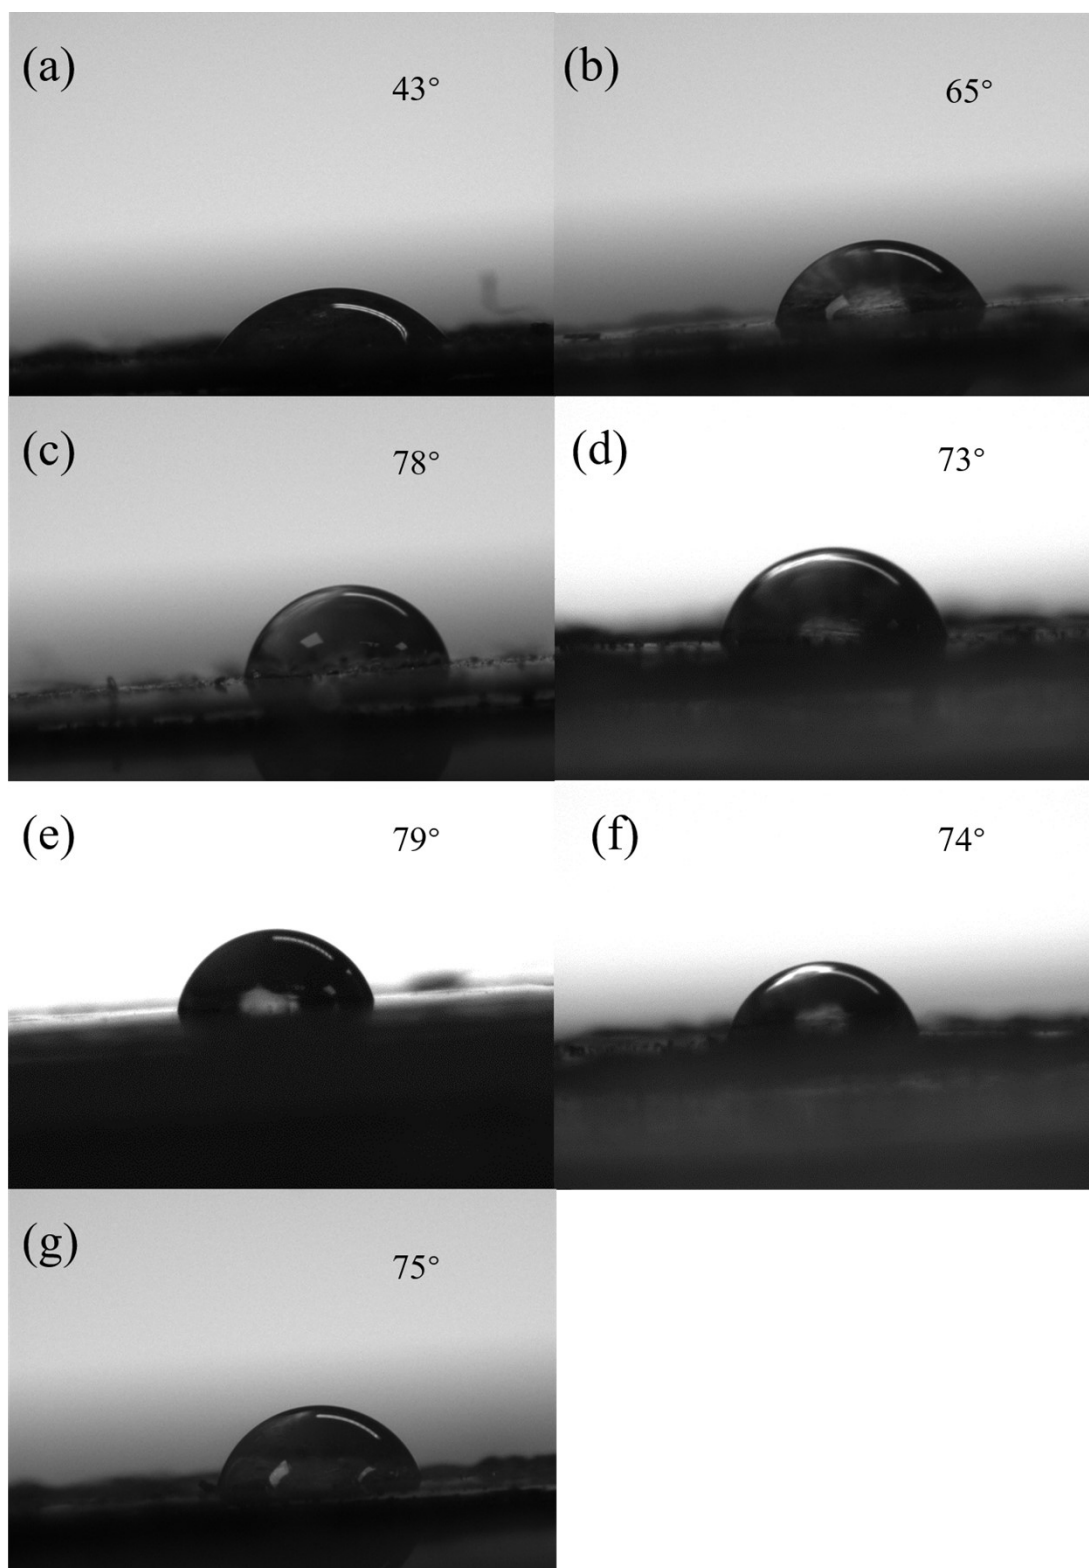

**Fig. S3** Contact angles of substrates prepared at different stages of the reaction. (a) before reaction begins (0 h); (b) during the reaction (2 h); (c) while the reaction is stable (8h); (d) after reaction terminates (12 h); (e) after reaction terminates (16 h); (f) after reaction terminates (20 h) and (g) after reaction terminates (24 h).

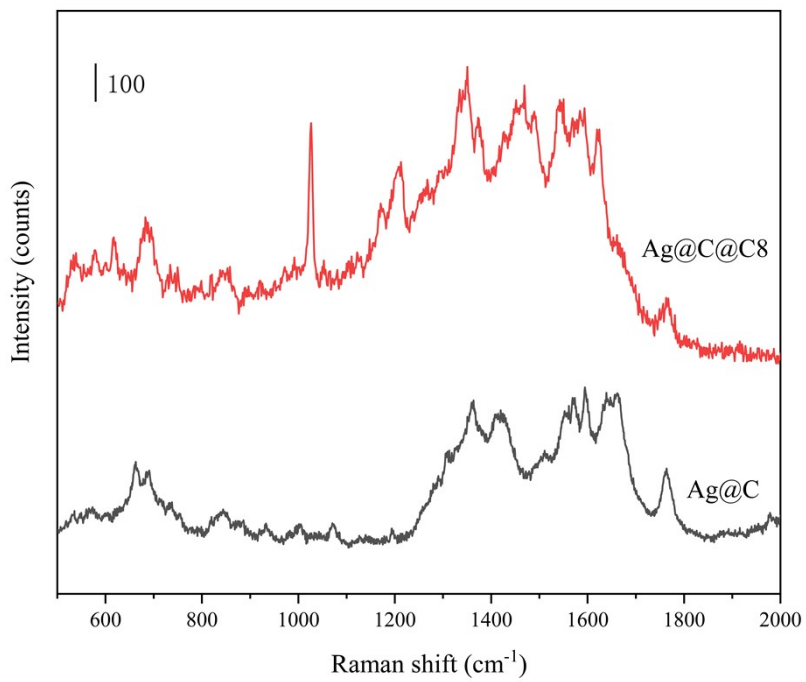

**Fig. S4** Raman spectra of Ag@C and Ag@C@C8.

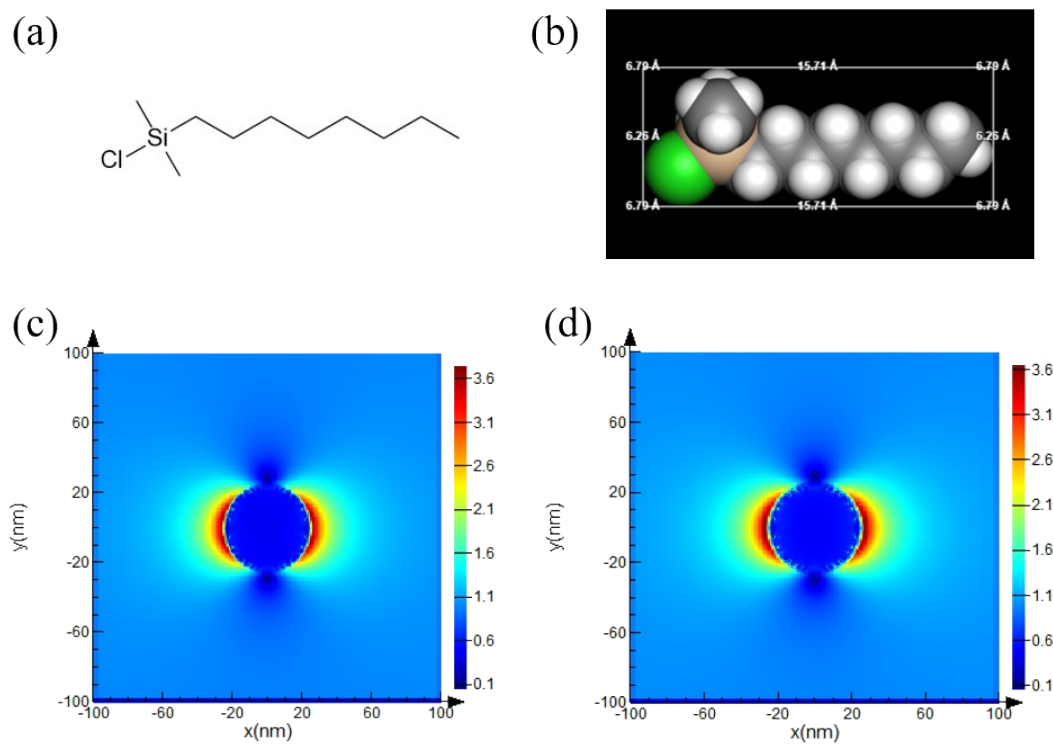

**Fig. S5** (a) The structural formula of C8; (b) the physical structure of C8; (c) the electromagnetic field distribution of Ag@C nanoparticle; and (d) the electromagnetic field distribution of Ag@C@C8 nanoparticle.

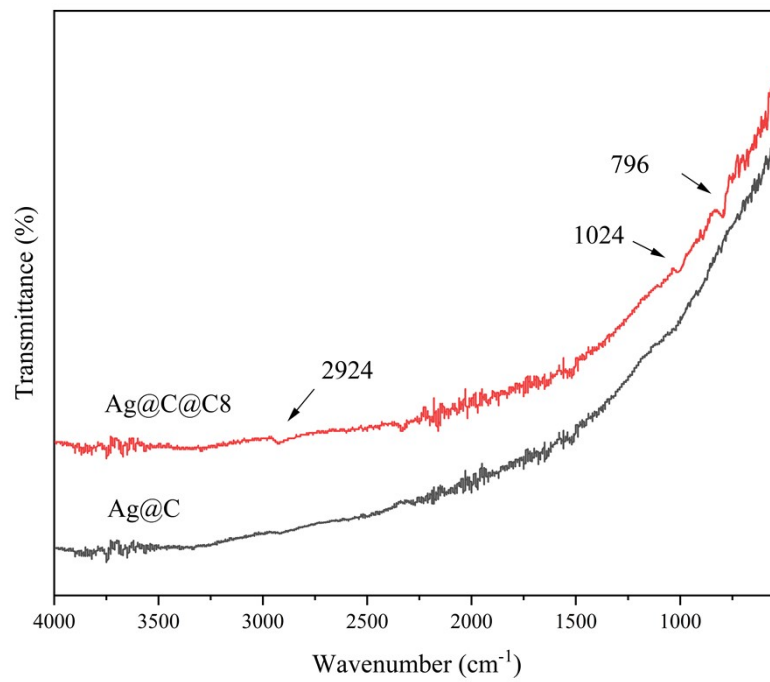

**Fig. S6** FTIR spectra of  $\text{Ag@C}$  and  $\text{Ag@C@C8}$ .

**Table S1** Raman intensities, mean values, error bars and coefficient of variation of different concentrations of R6G at 609cm<sup>-1</sup>.

| Concentration (M) | Sample   | The intensity of the peak at 609 cm <sup>-1</sup> |          |          |          |          |          | Mean value | coefficient of variation (%) | error bars |
|-------------------|----------|---------------------------------------------------|----------|----------|----------|----------|----------|------------|------------------------------|------------|
| 10 <sup>-7</sup>  | Sample 1 | Day 1-1                                           | 41778.19 | 41293.68 | 40557.46 | 42238.14 | 41694.52 | 41512.40   | 1.52                         | 630.53     |
|                   |          | Day 1-2                                           | 40497.5  | 42236.46 | 42600.63 | 42397.29 | 41925.13 | 41931.40   | 2.00                         | 838.76     |
|                   |          | Day 1-3                                           | 42117.75 | 42503.93 | 40350.14 | 42802.45 | 41502.16 | 41855.29   | 2.32                         | 971.71     |
|                   |          | Day 2-1                                           | 42494.93 | 40360.93 | 42949.26 | 40202.38 | 42098.87 | 41621.27   | 3.03                         | 1260.62    |
|                   |          | Day 2-2                                           | 40893.55 | 39031.56 | 43563.61 | 41695.87 | 40998.73 | 41236.66   | 3.96                         | 1632.66    |
|                   |          | Day 2-3                                           | 42744.17 | 41015.26 | 40548.74 | 42235.35 | 42456.77 | 41800.06   | 2.30                         | 960.96     |
|                   |          | Day 3-1                                           | 42355.81 | 41539.62 | 40068.49 | 41409.23 | 41571.64 | 41388.96   | 2.00                         | 826.88     |
|                   |          | Day 3-2                                           | 42635.21 | 41184.29 | 42051.63 | 41657.22 | 41649.26 | 41835.52   | 1.30                         | 542.40     |
|                   |          | Day 3-3                                           | 40846.03 | 41538.74 | 41600.68 | 42791.38 | 42116.56 | 41778.68   | 1.73                         | 724.36     |
|                   | Sample 2 | Day 1-1                                           | 42054.96 | 40913.97 | 40702.48 | 41080.03 | 40968.43 | 41143.97   | 1.28                         | 527.40     |
|                   |          | Day 1-2                                           | 42153.12 | 42195.07 | 40251.26 | 41738.95 | 42484.39 | 41764.56   | 2.12                         | 886.74     |
|                   |          | Day 1-3                                           | 42686.09 | 40872.33 | 42180.65 | 41079.09 | 41733.14 | 41710.26   | 1.81                         | 754.08     |
|                   |          | Day 2-1                                           | 41058.63 | 41340.37 | 40960.23 | 41193.38 | 42438.89 | 41398.30   | 1.45                         | 599.05     |
|                   |          | Day 2-2                                           | 40891.16 | 42617.34 | 41514.54 | 41451.82 | 40014.28 | 41297.83   | 2.31                         | 951.93     |
|                   |          | Day 2-3                                           | 39814.33 | 41046.78 | 42843.82 | 41957.53 | 41723.15 | 41477.12   | 2.73                         | 1130.18    |
|                   |          | Day 3-1                                           | 40989.43 | 42120.36 | 40976.51 | 42202.79 | 42884.23 | 41834.66   | 1.99                         | 832.10     |
|                   |          | Day 3-2                                           | 42243.63 | 42590.32 | 42628.32 | 41233.57 | 41051.16 | 41949.40   | 1.80                         | 754.57     |
|                   |          | Day 3-3                                           | 42671.46 | 40582.63 | 40610.64 | 42040.65 | 40571.68 | 41295.41   | 2.41                         | 993.69     |
|                   | Sample 3 | Day 1-1                                           | 41201.64 | 41436.23 | 41709.63 | 42635.49 | 42734.84 | 41943.57   | 1.67                         | 701.33     |
|                   |          | Day 1-2                                           | 40667.39 | 41460.43 | 41802.16 | 40631.71 | 41540.16 | 41220.37   | 1.30                         | 536.35     |
|                   |          | Day 1-3                                           | 39969.66 | 42511.59 | 41313.52 | 40169.04 | 42053.23 | 41203.41   | 2.72                         | 1122.24    |



|                  |         |          |          |          |          |          |          |       |         |
|------------------|---------|----------|----------|----------|----------|----------|----------|-------|---------|
|                  | Day 2-1 | 41777.43 | 41571.87 | 41150.66 | 41873.23 | 41289.17 | 41532.47 | 0.75  | 309.29  |
|                  | Day 2-2 | 41854.53 | 41705.76 | 42626.11 | 40770.73 | 40653.51 | 41522.13 | 1.97  | 818.85  |
|                  | Day 2-3 | 42686.39 | 42317.81 | 41387.23 | 42953.49 | 40334.73 | 41935.93 | 2.56  | 1073.47 |
|                  | Day 3-1 | 39766.61 | 40957.23 | 41057.51 | 41072.39 | 42815.54 | 41133.86 | 2.65  | 1088.37 |
|                  | Day 3-2 | 42576.99 | 42848.19 | 40335.57 | 42049.31 | 41439.53 | 41849.92 | 2.40  | 1003.32 |
|                  | Day 3-3 | 40754.25 | 42541.68 | 40423.02 | 41902.63 | 40156.81 | 41155.68 | 2.48  | 1021.59 |
|                  | Day 1-1 | 4727.03  | 5035.46  | 4472.65  | 4121.08  | 5513.26  | 4773.90  | 11.15 | 532.49  |
|                  | Day 1-2 | 5076.63  | 4153.41  | 4951.71  | 4742.19  | 5280.46  | 4840.88  | 8.91  | 431.12  |
|                  | Day 1-3 | 5120.63  | 4446.36  | 5194.85  | 4489.65  | 5151.32  | 4880.56  | 7.74  | 377.84  |
|                  | Day 2-1 | 5163.29  | 4605.85  | 4323.05  | 5208.16  | 4385.16  | 4737.10  | 8.93  | 423.10  |
| Sample 1         | Day 2-2 | 4962.56  | 4068.15  | 4026.19  | 5879.13  | 4787.44  | 4744.69  | 16.02 | 759.97  |
|                  | Day 2-3 | 3865.41  | 4847.39  | 5713.58  | 4567.25  | 4579.16  | 4714.56  | 14.14 | 666.48  |
|                  | Day 3-1 | 4678.52  | 5064.26  | 5399.14  | 3812.96  | 5762.33  | 4943.44  | 15.14 | 748.50  |
|                  | Day 3-2 | 4511.85  | 5088.46  | 4978.09  | 4619.22  | 4635.15  | 4766.55  | 5.27  | 251.11  |
|                  | Day 3-3 | 5016.91  | 5981.31  | 3856.62  | 4648.28  | 4792.46  | 4859.12  | 15.73 | 764.54  |
| 10 <sup>-9</sup> | Day 1-1 | 4588.25  | 4592.16  | 4368.06  | 4729.11  | 5389.86  | 4733.49  | 8.22  | 389.05  |
|                  | Day 1-2 | 5326.94  | 4968.46  | 5281.46  | 4473.16  | 4732.54  | 4956.51  | 7.32  | 362.89  |
|                  | Day 1-3 | 4882.55  | 4435.26  | 4761.29  | 4956.55  | 4398.26  | 4686.78  | 5.47  | 256.50  |
|                  | Day 2-1 | 4723.96  | 4865.15  | 4843.49  | 4701.46  | 5166.05  | 4860.02  | 3.82  | 185.48  |
| Sample 2         | Day 2-2 | 5352.42  | 4363.25  | 5098.15  | 4501.48  | 5049.23  | 4872.91  | 8.64  | 421.15  |
|                  | Day 2-3 | 4531.75  | 4519.53  | 5076.51  | 5496.34  | 4706.46  | 4866.12  | 8.59  | 417.99  |
|                  | Day 3-1 | 5431.84  | 4531.87  | 5061.67  | 4316.56  | 4206.97  | 4709.78  | 11.06 | 520.65  |
|                  | Day 3-2 | 4761.95  | 4936.52  | 5163.23  | 4491.21  | 4396.17  | 4749.82  | 6.64  | 315.38  |
|                  | Day 3-3 | 5143.94  | 4361.76  | 5374.16  | 4961.74  | 4163.52  | 4801.02  | 10.78 | 517.51  |
| Sample 3         | Day 1-1 | 4753.26  | 4865.23  | 5197.05  | 4992.06  | 4715.98  | 4904.72  | 3.99  | 195.71  |

|                   |         |         |         |         |         |         |         |       |        |
|-------------------|---------|---------|---------|---------|---------|---------|---------|-------|--------|
|                   | Day 1-2 | 4977.25 | 4784.31 | 4475.15 | 4963.45 | 5266.67 | 4893.37 | 5.94  | 290.73 |
|                   | Day 1-3 | 4545.93 | 5363.56 | 5454.19 | 4306.23 | 4425.79 | 4819.14 | 11.33 | 545.92 |
|                   | Day 2-1 | 5273.62 | 4880.32 | 4535.05 | 5213.33 | 3605.84 | 4701.63 | 14.46 | 679.97 |
|                   | Day 2-2 | 4732.16 | 5442.15 | 5037.99 | 3588.16 | 5438.61 | 4847.81 | 15.77 | 764.62 |
|                   | Day 2-3 | 4820.13 | 4981.31 | 4755.13 | 5005.46 | 5339.88 | 4980.38 | 4.56  | 227.09 |
|                   | Day 3-1 | 5403.62 | 5073.41 | 5423.08 | 4187.06 | 4801.46 | 4977.73 | 10.27 | 511.15 |
|                   | Day 3-2 | 4617.95 | 5584.02 | 4516.17 | 5398.66 | 4355.65 | 4894.49 | 11.37 | 556.68 |
|                   | Day 3-3 | 5004.16 | 5095.64 | 4295.13 | 4696.78 | 4890.62 | 4796.47 | 6.62  | 317.33 |
|                   | Day 1-1 | 568.61  | 551.64  | 433.85  | 492.45  | 532.52  | 515.81  | 10.45 | 53.88  |
|                   | Day 1-2 | 563.15  | 463.92  | 562.63  | 578.65  | 553.15  | 544.30  | 8.42  | 45.85  |
|                   | Day 1-3 | 463.15  | 603.85  | 516.11  | 550.04  | 502.44  | 527.12  | 10.05 | 53.00  |
|                   | Day 2-1 | 521.64  | 543.26  | 573.52  | 517.63  | 599.64  | 551.14  | 6.36  | 35.03  |
|                   | Day 2-2 | 632.23  | 765.42  | 624.46  | 800.26  | 467.73  | 658.02  | 20.07 | 132.07 |
|                   | Day 2-3 | 655.65  | 706.43  | 664.33  | 739.04  | 675.76  | 688.24  | 4.98  | 34.28  |
|                   | Day 3-1 | 564.65  | 506.19  | 569.74  | 532.54  | 503.65  | 535.35  | 5.84  | 31.24  |
|                   | Day 3-2 | 484.32  | 586.45  | 523.65  | 629.82  | 585.69  | 561.99  | 10.25 | 57.58  |
|                   | Day 3-3 | 595.32  | 426.31  | 599.36  | 613.11  | 657.48  | 578.32  | 15.30 | 88.48  |
| 10 <sup>-11</sup> | Day 1-1 | 654.96  | 496.12  | 481.06  | 518.77  | 558.38  | 541.86  | 12.85 | 69.62  |
|                   | Day 1-2 | 452.63  | 503.22  | 577.32  | 680.23  | 490.03  | 540.69  | 16.68 | 90.19  |
|                   | Day 1-3 | 564.65  | 457.06  | 533.12  | 599.26  | 509.58  | 532.73  | 10.16 | 54.10  |
|                   | Day 2-1 | 456.36  | 550.96  | 520.53  | 576.13  | 502.85  | 521.37  | 8.81  | 45.95  |
|                   | Day 2-2 | 556.32  | 514.27  | 504.06  | 515.34  | 517.59  | 521.52  | 3.86  | 20.14  |
|                   | Day 2-3 | 563.64  | 509.64  | 509.58  | 589.22  | 495.53  | 533.52  | 7.61  | 40.61  |
|                   | Day 3-1 | 496.35  | 563.56  | 413.62  | 560.02  | 505.79  | 507.87  | 11.99 | 60.91  |
|                   | Day 3-2 | 503.63  | 493.52  | 548.55  | 620.49  | 408.32  | 514.90  | 15.11 | 77.82  |

---

|          |         |        |        |        |        |        |        |       |       |
|----------|---------|--------|--------|--------|--------|--------|--------|-------|-------|
|          | Day 3-3 | 552.36 | 612.07 | 515.12 | 528.85 | 453.89 | 532.46 | 10.80 | 57.49 |
|          | Day 1-1 | 596.45 | 561.25 | 585.32 | 523.52 | 520.35 | 557.38 | 6.24  | 34.78 |
|          | Day 1-2 | 648.85 | 536.01 | 523.05 | 511.49 | 503.76 | 544.63 | 10.93 | 59.52 |
|          | Day 1-3 | 596.32 | 529.16 | 618.66 | 471.66 | 434.78 | 530.12 | 14.83 | 78.63 |
|          | Day 2-1 | 696.65 | 605.75 | 537.28 | 435.38 | 509.58 | 556.93 | 17.80 | 99.13 |
| Sample 3 | Day 2-2 | 535.23 | 555.19 | 593.08 | 616.48 | 530.87 | 566.17 | 6.60  | 37.35 |
|          | Day 2-3 | 535.61 | 586.31 | 527.77 | 516.79 | 509.57 | 535.21 | 5.65  | 30.26 |
|          | Day 3-1 | 683.21 | 569.01 | 501.24 | 432.68 | 550.49 | 547.33 | 16.90 | 92.48 |
|          | Day 3-2 | 643.33 | 656.16 | 502.01 | 478.38 | 559.59 | 567.89 | 14.17 | 80.47 |
|          | Day 3-3 | 453.86 | 548.66 | 658.14 | 525.58 | 493.37 | 535.92 | 14.38 | 77.06 |

---

**Table S2** The Raman intensities , mean values, error bars and coefficient of variation of within- and between-days at different concentrations of R6G at 609cm<sup>-1</sup>.

| Concentration (M) | Sample   | Time  | Mean value of within-day | Mean value of between-days | error bars of within-day | error bars of between-days | coefficient of variation (%) of within-day | coefficient of variation (%) of between-days |
|-------------------|----------|-------|--------------------------|----------------------------|--------------------------|----------------------------|--------------------------------------------|----------------------------------------------|
| 10 <sup>-7</sup>  | Sample 1 | Day 1 | 41766.36                 | 41662.25                   | 813.67                   | 932.10                     | 1.95%                                      | 2.24%                                        |
|                   |          | Day 2 | 41552.67                 |                            | 1284.75                  |                            | 3.10%                                      |                                              |
|                   |          | Day 3 | 41667.72                 |                            | 697.88                   |                            | 1.68%                                      |                                              |
|                   | Sample 2 | Day 1 | 41539.60                 | 41541.28                   | 722.74                   | 825.53                     | 1.74%                                      | 1.99%                                        |
|                   |          | Day 2 | 41391.08                 |                            | 893.72                   |                            | 2.16%                                      |                                              |
|                   |          | Day 3 | 41693.16                 |                            | 860.12                   |                            | 2.07%                                      |                                              |
|                   | Sample 3 | Day 1 | 41455.78                 | 41499.70                   | 786.64                   | 852.76                     | 1.90%                                      | 2.06%                                        |
|                   |          | Day 2 | 41663.51                 |                            | 733.87                   |                            | 1.76%                                      |                                              |
|                   |          | Day 3 | 41379.82                 |                            | 1037.76                  |                            | 2.51%                                      |                                              |
| 10 <sup>-9</sup>  | Sample 1 | Day 1 | 4831.78                  | 4806.76                    | 447.15                   | 550.57                     | 9.27%                                      | 11.45%                                       |
|                   |          | Day 2 | 4732.12                  |                            | 616.52                   |                            | 13.03%                                     |                                              |
|                   |          | Day 3 | 4856.37                  |                            | 588.05                   |                            | 12.05%                                     |                                              |
|                   | Sample 2 | Day 1 | 4792.26                  | 4804.05                    | 336.14                   | 376.29                     | 7.00%                                      | 7.84%                                        |
|                   |          | Day 2 | 4866.35                  |                            | 341.54                   |                            | 7.02%                                      |                                              |
|                   |          | Day 3 | 4753.54                  |                            | 451.18                   |                            | 9.49%                                      |                                              |
|                   | Sample 3 | Day 1 | 4872.41                  | 41693.16                   | 344.12                   | 454.36                     | 7.09%                                      | 9.37%                                        |
|                   |          | Day 2 | 4843.28                  |                            | 557.23                   |                            | 11.60%                                     |                                              |

---

|                   |             |       |         |        |  |        |       |        |        |
|-------------------|-------------|-------|---------|--------|--|--------|-------|--------|--------|
|                   |             | Day 3 | 4889.56 |        |  | 461.72 |       | 9.42%  |        |
|                   | Sample<br>1 | Day 1 | 529.08  |        |  | 50.91  |       | 9.64%  |        |
|                   |             | Day 2 | 632.47  | 573.37 |  | 67.13  | 59.05 | 10.47% | 10.19% |
|                   |             | Day 3 | 558.55  |        |  | 59.10  |       | 10.46% |        |
|                   |             | Day 1 | 538.43  |        |  | 71.30  |       | 13.23% |        |
| 10 <sup>-11</sup> | Sample<br>2 | Day 2 | 525.47  | 527.43 |  | 35.56  | 57.43 | 6.76%  | 10.19% |
|                   |             | Day 3 | 518.41  |        |  | 65.41  |       | 12.64% |        |
|                   |             | Day 1 | 544.04  |        |  | 57.64  |       | 10.67% |        |
|                   | Sample<br>3 | Day 2 | 552.77  | 549.06 |  | 55.58  | 65.52 | 10.02% | 11.94% |
|                   |             | Day 3 | 550.38  |        |  | 83.34  |       | 15.15% |        |

---

**Table S3** The comparisons of our synthesized Ag@C@C8 nanoparticles and other SERS substrates.

| Substrate type                    | Target molecule | LOD                     | Ref       |
|-----------------------------------|-----------------|-------------------------|-----------|
| Au@Ag                             | Rhodamine 6G    | $10^{-12}$ M            | 1         |
| Ag@Fe <sub>3</sub> O <sub>4</sub> | Rhodamine 6G    | $10^{-11}$ M            | 2         |
| SiO <sub>2</sub> @Ag              | Rhodamine 6G    | $9 \times 10^{-9}$ M    | 3         |
| Au@4-ATP@Ag                       | Crystal violet  | $1.9 \times 10^{-9}$ M  | 4         |
| Ag/PVA@Ag                         | Crystal violet  | $10^{-10}$ M            | 5         |
| Ag/PAOCG                          | Crystal violet  | $10^{-10}$ M            | 6         |
| 3D porous Ag fiber                | Malachite green | $8.48 \times 10^{-9}$ M | 7         |
| the paper-based Au/Ag             | Malachite green | $4.3 \times 10^{-9}$ M  | 8         |
| Ag/graphene@Au                    | Malachite green | $10^{-11}$ M            | 9         |
| Ag nanorod arrays                 | Malachite green | $10^{-9}$ M             | 10        |
| Ag@C@C8                           | Rhodamine 6G    | $3 \times 10^{-12}$ M   | this work |
|                                   | Crystal violet  | $2.2 \times 10^{-10}$ M | this work |
|                                   | Malachite green | $1 \times 10^{-9}$ M    | this work |

**Table S4** Standard recovery experiments with malachite green in different aqueous

| Sample               | The amount of malachite green added | Detection amount of malachite green | Recovery rate (%) |
|----------------------|-------------------------------------|-------------------------------------|-------------------|
| Fish water 1         | 1 $\mu\text{M}$                     | 0.927 $\mu\text{M}$                 | 92.7%             |
|                      | 0.5 $\mu\text{M}$                   | 0.509 $\mu\text{M}$                 | 101.8%            |
|                      | 0.1 $\mu\text{M}$                   | 0.098 $\mu\text{M}$                 | 98.0%             |
|                      | 0 $\mu\text{M}$                     | —                                   | —                 |
| Fish water 2         | 1 $\mu\text{M}$                     | 0.939 $\mu\text{M}$                 | 93.9%             |
|                      | 0.5 $\mu\text{M}$                   | 0.534 $\mu\text{M}$                 | 106.8%            |
|                      | 0.1 $\mu\text{M}$                   | 0.1083 $\mu\text{M}$                | 108.3%            |
|                      | 0 $\mu\text{M}$                     | —                                   | —                 |
| Laboratory tap water | 1 $\mu\text{M}$                     | 0.949 $\mu\text{M}$                 | 94.9%             |
|                      | 0.5 $\mu\text{M}$                   | 0.482 $\mu\text{M}$                 | 96.4%             |
|                      | 0.1 $\mu\text{M}$                   | 0.0988 $\mu\text{M}$                | 98.8%             |
|                      | 0 $\mu\text{M}$                     | —                                   | —                 |

solution.

Note: "—" means not detected.

## References

1. B. Chen, G. Meng, Q. Huang, Z. Huang, Q. Xu, C. Zhu, Y. Qian and Y. Ding, *ACS. Appl. Mater. Inter.*, 2014, **6**, 15667-15675.
2. L. Sun, J. He, S. An, J. Zhang and D. Ren, *J. Mol. Struct.*, 2013, **1046**, 74-81.
3. S. Long, L. Li, H. Guo, W. Yang and F. Lu, *Dyes Pigments*, 2012, **95**, 473-477.
4. L. Sun, M. Zhang, V. Natarajan, X. Yu, X. Zhang and J. Zhan, *RSC Adv.*, 2017, **7**, 23866-23874.
5. X. Zhao, C. Li, Z. Li, J. Yu, J. Pan, H. Si, C. Yang, S. Jiang, C. Zhang and B. Man, *Nanophotonics*, 2019, **8**, 1719-1729.
6. S. Liu, J. Yu, T. Wang and F. Li, *J. Mater. Sci.*, 2017, **52**, 13748-13763..
7. H. Lv, Q. Guan, Y. Wang and X. Zhang, *RSC Adv.*, 2021, **11**, 12893-12901.
8. G. Yang, X. Fang, Q. Jia, H. Gu, Y. Li, C. Han and L. L. Qu, *Mikrochim. Acta*, 2020, **187**, 310-320.
9. C. Zhang, C. Li, J. Yu, S. Jiang, S. Xu, C. Yang, Y. J. Liu, X. Gao, A. Liu and B. Man, *Sensor. Actuat. B-Chem.*, 2018, **258**, 163-171.
10. X. Li, X. Tian, S. Liu, C. Wu, Y. Han, L. Meng, L. Song and Y. Zhang, *J. Mater. Sci.*, 2020, **55**, 14019-14030.
